# Supplementary material for: Conformational energies and equilibria of cyclic dinucleotidesin vacuoand in solution: computational chemistryvs.NMR experiments
Source: Royal Society of Chemistry journal article supplement (doi:10.1039/d0cp05993e), 2021-01-01
Supplement: d0cp05993e2.pdf [file d0cp05993e2.pdf]

Conformational Energies and Equilibria of Cyclic  
Dinucleotides *In Vacuo* and In Solution: Computational  
Chemistry vs. NMR Experiments  
*Supplementary Information*

Ondrej Gutten,<sup>1,\*</sup> Petr Jurečka,<sup>2</sup> Zahra Aliakbar Tehrani,<sup>1,#</sup> Miloš Budešínský,<sup>1</sup> Jan Řezáč,<sup>1</sup>  
Lubomír Rulišek<sup>1,\*</sup>

<sup>1</sup> Institute of Organic Chemistry and Biochemistry of the Czech Academy of Sciences,  
Flemingovo náměstí 2, 166 10, Praha 6, Czech Republic

<sup>2</sup> Department of Physical Chemistry, Faculty of Science, Palacky University Olomouc, 17.  
listopadu 12, 771 46, Olomouc Czech Republic

# Currently at Institute of Biotechnology of the Czech Academy of Sciences, BIOCEV,  
Průmyslová 595, 252 50 Vestec, Czech Republic

\* Corresponding Authors: gutten@uochb.cas.cz; rulisek@uochb.cas.cz

**Table S1:** Software used for QM calculations.

| <b>Method</b>                   | <b>Software</b> | <b>Version</b> | <b>Integration grid for single-point calculations</b> |
|---------------------------------|-----------------|----------------|-------------------------------------------------------|
| <b>B-LYP</b>                    | TurboMole       | 7.2            | m3 (default)                                          |
| <b>B-P</b>                      | TurboMole       | 7.2            | m3 (default)                                          |
| <b>B97-D</b>                    | TurboMole       | 7.2            | m3 (default)                                          |
| <b>OLYP</b>                     | ORCA            | 4.0.1.2        | Grid 2, FinalGrid 4, (default)                        |
| <b>PBE</b>                      | TurboMole       | 7.2            | m3 (default)                                          |
| <b>revPBE</b>                   | ORCA            | 4.0.1.2        | Grid 2, FinalGrid 4, (default)                        |
| <b>M06-L</b>                    | TurboMole       | 7.2            | m3 (default)                                          |
| <b>revTPSS</b>                  | ORCA            | 4.0.1.2        | Grid 2, FinalGrid 4, (default)                        |
| <b>SCAN</b>                     | ORCA            | 4.0.1.2        | Grid 5, IntAcc 5.5                                    |
| <b>TPSS</b>                     | TurboMole       | 7.2            | m3 (default)                                          |
| <b>B3-LYP</b>                   | TurboMole       | 7.2            | m3 (default)                                          |
| <b>BH-LYP</b>                   | TurboMole       | 7.2            | m3 (default)                                          |
| <b>M06</b>                      | TurboMole       | 7.2            | m3 (default)                                          |
| <b>M06-2X</b>                   | TurboMole       | 7.2            | m3 (default)                                          |
| <b>PBE0</b>                     | TurboMole       | 7.2            | m3 (default)                                          |
| <b>PW6B95</b>                   | TurboMole       | 7.2            | m3 (default)                                          |
| <b>TPSSH</b>                    | TurboMole       | 7.2            | m3 (default)                                          |
| <b><math>\omega</math>B-97X</b> | ORCA            | 4.0.1.2        | Grid 2, FinalGrid 4, (default)                        |
| <b>B2PLYP</b>                   | ORCA            | 4.1.0          | Grid 5, FinalGrid 6                                   |
| <b>PWPB95</b>                   | ORCA            | 4.1.0          | Grid 5, FinalGrid 6                                   |
| <b>CCSD(T)</b>                  | TurboMole       | 7.2            |                                                       |
| <b>DLPNO-CCSD(T)</b>            | ORCA            | 4.0.1.2        |                                                       |
| <b>MP2</b>                      | TurboMole       | 7.2            |                                                       |
| <b>MP2-F12</b>                  | TurboMole       | 7.2            |                                                       |
| <b>HF-3c</b>                    | ORCA            | 4.0.1.2        |                                                       |
| <b>B97-3c</b>                   | ORCA            | 4.0.1.2        | Grid 3 (default)                                      |
| <b>PBEh-3c</b>                  | ORCA            | 4.0.1.2        | Grid 3 (default)                                      |

**Table S2:** Averaged MUE values (see **Equation 4**) of several DFT functionals obtained obtained with different integration grids for the CDN set. Triple- $\zeta$  (def2-TZVPD) basis set was used in all cases. DLPNO-CCSD(T)/MP2-F12 is used as reference, see **Equation 2**. All values in kcal.mol<sup>-1</sup>.

| <b>Functional</b> | <b>Integration Grid</b> | <b>No dispersion correction</b> | <b>D3(0)</b> | <b>D3(BJ)</b> | <b>D4</b> |
|-------------------|-------------------------|---------------------------------|--------------|---------------|-----------|
| <b>B-LYP</b>      | m3                      | 6.249                           | 0.675        | 0.761         | 0.748     |
| <b>B-LYP</b>      | m5                      | 6.241                           | 0.676        | 0.759         | 0.745     |
| <b>B-P</b>        | m3                      | 5.341                           | 1.038        | 1.026         | 0.911     |
| <b>B-P</b>        | m5                      | 5.331                           | 1.043        | 1.028         | 0.910     |
| <b>B3-LYP</b>     | m3                      | 5.254                           | 0.480        | 0.592         | 0.585     |
| <b>B3-LYP</b>     | m5                      | 5.248                           | 0.477        | 0.591         | 0.586     |
| <b>SCAN</b>       | Grid 4, IntAcc 4        | 1.533                           | 0.459        | 0.432         | 0.464     |
| <b>SCAN</b>       | Grid 5, IntAcc 5.5      | 1.527                           | 0.466        | 0.445         | 0.478     |
| <b>SCAN</b>       | Grid 6, IntAcc 6        | 1.526                           | 0.464        | 0.446         | 0.476     |

S1 Estimation of error of DLPNO-CCSD(T) TightPNO/MP2F12 with respect to CCSD(T)/MP2-CBS

Using CBS-extrapolated CCSD(T) energies, see Equation S1, is prohibitive for systems of CDN size (around 70 atoms).

$$E_{CBS} = \frac{4^3 * E^{MP2 - F12/ aug - cc - pVQZ} - 3^3 * E^{MP2 - F12/ aug - cc - pVTZ}}{4^3 - 3^3} \quad (S1)$$

$$E_{hoc} = E^{CCSD(T)/aug - cc - pVDZ} - E^{MP2/aug - cc - pVDZ}$$

In the main text we use an alternative reference scheme, DLPNO-CCSD(T) TightPNO/MP2-F12, accuracy of which we try to justify by comparing the error of different schemes for the 20 conformers of 3'3'-c-GAMP from the CDN dataset (see **Methods** section) and their fragments, see **Figure S1**. This allows for estimation of the error on the unfragmented original system.

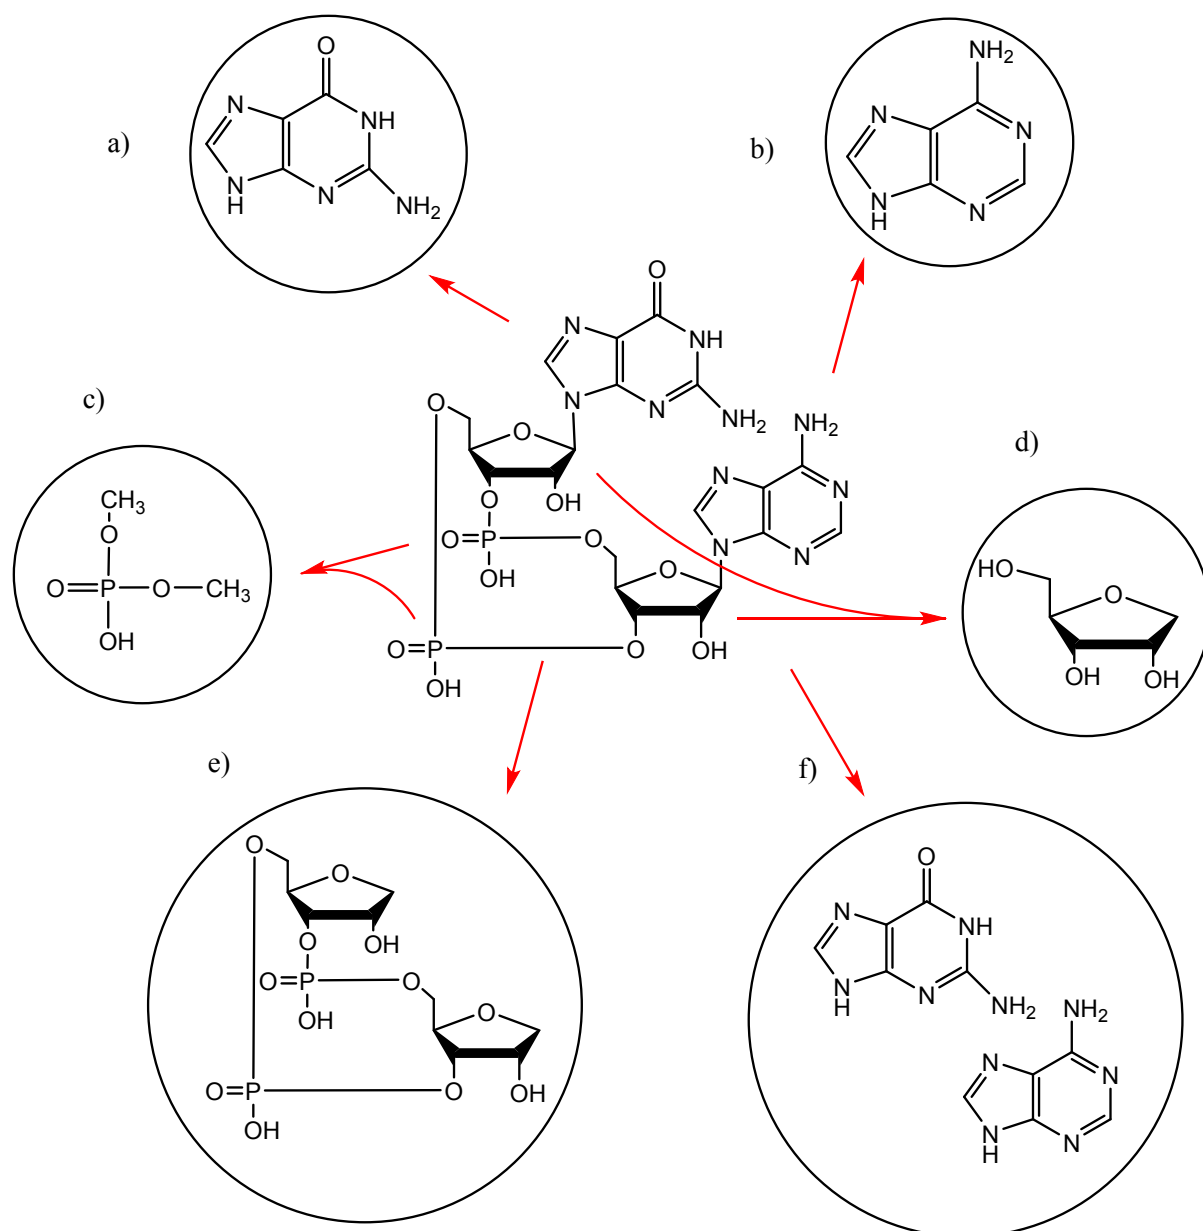

**Figure S1:** 16 model systems are created from each of the 20 conformers of 3'3'-c-GAMP (in the center). There are two base fragments, i.e. guanine (a) and adenine (b), and four macrocycle fragments, i.e. two dimethylphosphates (c) and two sugar moieties (d). Each of the base fragments (a) and (b) is individually combined with each of the macrocycle fragments (c) and (d), yielding  $2 \times 4 = 8$  additional model systems. The whole macrocycle without bases (e) is considered as a separate model system, as well as both bases (f).

Using the fragments shown in **Figure S1**, the estimate may be obtained in a spirit of pairwise energy decomposition, i.e. by summing up energies of model systems made of two basic

fragments, such as **Figure S1/f**, while subtracting energies of the individual basic fragments (**Figure S1/a-e**) in a way that avoids double-counting of any part of the CDN. Specifically, the estimate is calculated as:

$$E_{estimate} = E(\text{macrocycle}) + E(\text{bases}) + E(\text{macrocycle} + \text{bases})$$

Where  $E(\text{macrocycle})$  is energy of a macrocycle fragment (**Figure S1/e**),  $E(\text{bases})$  is energy of the two purine bases (**Figure S1/f**) and  $E(\text{macrocycle}+\text{bases})$  is a sum of pairwise interaction energies between a combined model system of a base and a macrocycle fragment (e.g. guanine plus one of the phosphate fragments) and its individual basic fragments (i.e. guanine **Figure S1/a** and the phosphate **Figure S1/c**).

The errors for different schemes obtained using this estimate and errors for the whole molecule are shown in **Table S3**. Note that DLPNO-CCSD(T) TightPNO/MP2-F12, for which conformational energies of whole molecules can be calculated, is used as a reference in this case. The errors on the fragmented dataset and whole molecules in **Table S3** show correlation of ca. 0.8. We deem this correlation to be sufficiently high for the following qualitative argument. On the fragmented dataset, DLPNO-CCSD(T) TightPNO/MP2-F12 scheme exhibits similar errors with respect to CCSD(T)/MP2-CBS as DLPNO-CCSD(T) NormalPNO/MP2-CBS exhibits with respect to DLPNO-CCSD(T) TightPNO/MP2-F12. Since the mutual MUE of the latter pair for the whole systems is around 0.2 kcal.mol<sup>-1</sup>, we speculate that error of comparable magnitude is to be expected for DLPNO-CCSD(T) TightPNO/MP2-F12 with respect to CCSD(T)/MP2-CBS.

**Table S3:** Estimates of mean unsigned error based on fragmentation scheme (left column) and true mean unsigned errors obtained for whole molecules (right column). DLPNO-CCSD(T) TightPNO/MP2-F12 is taken as reference. The missing values are not available due to high computational cost of CCSD(T) on whole CDN systems, but can be estimated.

| <b>Method</b>                              | <b>MUE Estimate<br/>[kcal/mol]</b> | <b>True MUE<br/>[kcal/mol]</b> |
|--------------------------------------------|------------------------------------|--------------------------------|
| <b>CCSD(T)/MP2-F12</b>                     | 0.3                                | -                              |
| <b>DLPNO-CCSD(T)<br/>NormalPNO/MP2-CBS</b> | 0.4                                | 0.2                            |
| <b>CCSD(T)/MP2-CBS</b>                     | 0.4                                | -                              |
| <b>MP2/CBS</b>                             | 1.2                                | 1.4                            |
| <b>SCS-MP2/CBS</b>                         | 1.1                                | 0.6                            |
| <b>SOS-MP2/CBS</b>                         | 2.1                                | 1.4                            |
| <b>MP2F12</b>                              | 1.3                                | 1.4                            |
| <b>MP2-SCS-F12</b>                         | 1.2                                | 0.6                            |
| <b>MP2-SOS-F12</b>                         | 2.2                                | 1.4                            |
| <b>BP+D3(0)</b>                            | 1.2                                | 1.3                            |
| <b>B3LYP+D3(0)</b>                         | 0.4                                | 0.4                            |

**Table S4:** The  $^1\text{H}$  and  $^{31}\text{P}$  NMR data of 3',3'-c-diAMP, 3',3'-c-GAMP, 3',3'-c-diGMP in  $\text{D}_2\text{O}$ .

| Compound       | Res. | H-1'                 | H-2'                                 | H-3''                                                  | H-4'                                                                  | H-5'a                                                    | H-5'b                                                      | Base protons                 | $^{31}\text{P}$ |
|----------------|------|----------------------|--------------------------------------|--------------------------------------------------------|-----------------------------------------------------------------------|----------------------------------------------------------|------------------------------------------------------------|------------------------------|-----------------|
| 3',3'-c-di-AMP | A    | 6.06 s<br>1',2' < 1  | 4.87 bd<br>2',1' < 1<br>2',3' = 4.4  | 5.02 ddd<br>3',2' = 4.4<br>3',4' = 9.0<br>3',P = 7.4   | 4.52 dm<br>4',3' = 9.0<br>4',5'a = 2.3<br>4,5'b = 1.4<br>4',P = 3.8   | 4.49 bdd<br>5a',4' = 2.3<br>5'a,5'b = 11.6<br>5'a,P < 1  | 4.14 ddd<br>5'b,4 = 1.4<br>5'b,5'a = 11.6<br>5'b,P = 4.0   | H-2: 7.94 bs<br>H-8: 8.32 bs | -0.56           |
| 3',3'-c-GAMP   | G    | 5.83 bs<br>1',2' < 1 | 4.85 bd<br>2',1' < 1<br>2',3' = 4.7  | 5.055 ddd<br>3',2' = 4.7<br>3',4' = 8.9<br>3',P' = 7.3 | 4.43 ddt<br>4',3' = 8.9<br>4',5'a = 2.3<br>4',5'b = 1.4<br>4',P = 3.7 | 4.40 dt<br>5'a,4' = 2.3<br>5'a,5'b = 12.0<br>5'a,P = 1.8 | 4.08 ddd<br>5'b,4' = 1.4<br>5'b,5'a = 12.0<br>5'b,P = 3.9  | H-8: 7.84 s                  | -0.33           |
|                | A    | 6.01 d<br>1',2' < 1  | 4.865 bd<br>2',1' < 1<br>2',3' = 4.9 | 5.04 td<br>3',2' = 4.9<br>3',4' = 8.9<br>3',P = 7.2    | 4.49 dm<br>4',3' = 8.9<br>4',5'a = 2.2<br>4',5'b = 1.7<br>4',P = 3.7  | 4.44 dt<br>5'a,4' = 2.2<br>5'a,5'b = 12.0<br>5'a,P = 2.2 | 4.115 ddd<br>5'b,4' = 1.7<br>5'b,5'a = 12.0<br>5'b,P = 3.9 | H-2: 7.99 s<br>H-8: 8.28 s   | -0.49           |
| 3',3'-c-di-GMP | G    | 5.97 s<br>1',2' < 1  | 4.74 bd<br>2',1' < 1<br>2',3' = 4.9  | 4.90 td<br>3',2' = 4.9<br>3',4' = 8.5<br>3',P = 8.5    | 4.40 dm<br>4',3' = 8.5<br>4',5'a = 2.1<br>4',5'b = 1.8<br>4',P = 3.3  | 4.35 dt<br>5'a,4' = 2.1<br>5'a,5'b = 12.1<br>5'a,P = 2.1 | 4.10 ddd<br>5'b,4 = 1.8<br>5'b,5'a = 12.1<br>5'b,P = 3.9   | H-8: 8.01 s                  | -0.18           |



**Table S5:** The  $^{13}\text{C}$  NMR data of 3',3'-c-diAMP, 3',3'-c-GAMP, 3',3'-c-diGMP in  $\text{D}_2\text{O}$ .  
Values of observed  $J(\text{C},\text{P})$  are given in parentheses.

| Compound       | Res. | C-1'  | C-2'            | C-3'           | C-4'                  | C-5'           | C-2    | C-4    | C-5    | C-6    | C-8    |
|----------------|------|-------|-----------------|----------------|-----------------------|----------------|--------|--------|--------|--------|--------|
| 3',3'-c-di-AMP | A    | 93.29 | 76.22<br>( <1 ) | 72.99<br>(4.8) | 83.02<br>(11.0; 11.0) | 65.15<br>(4.7) | 155.10 | 149.44 | 120.92 | 157.44 | 141.39 |
| 3',3'-c-GAMP   | G    | 93.09 | 75.92<br>( <1 ) | 73.07<br>(4.7) | 83.04<br>(10.8; 10.8) | 65.06<br>(4.7) | 156.25 | 152.33 | 118.90 | 160.63 | 139.33 |
|                | A    | 93.65 | 75.91<br>( <1 ) | 73.14<br>(4.9) | 83.48<br>(10.6; 10.6) | 65.21<br>(4.6) | 155.23 | 149.84 | 121.06 | 157.49 | 141.89 |
| 3',3'-c-di-GMP | G    | 92.13 | 76.08<br>( <1 ) | 73.23<br>(4.8) | 82.50<br>(10.7; 10.1) | 65.04<br>(5.2) | 156.52 | 153.37 | 119.11 | 161.38 | 139.79 |

**Table S6:** MAD values (see **Equation 5**) of several DFT functionals obtained for the CDN set with triple- $\zeta$  (def2-TZVPD) basis set and several dispersion corrections. Entries marked as ‘n.a.’ indicate combinations that are not available. DLPNO-CCSD(T)/MP2-F12 is used as reference, see **Equation 2**. All values in kcal.mol<sup>-1</sup>.

| Functional                      | Jacob's ladder class | No dispersion correction | D3(0) | D3(BJ) | D4   |
|---------------------------------|----------------------|--------------------------|-------|--------|------|
| <b>B-LYP</b>                    | GGA                  | 15.7                     | 2.1   | 2.2    | 2.5  |
| <b>B-P</b>                      | GGA                  | 13.2                     | 3.0   | 3.1    | 2.9  |
| <b>B97-D</b>                    | GGA                  | 17.8                     | 2.8   | 2.3    | n.a. |
| <b>OLYP</b>                     | GGA                  | 23.3                     | 3.8   | 3.5    | 3.1  |
| <b>PBE</b>                      | GGA                  | 10.9                     | 3.6   | 3.6    | 3.2  |
| <b>revPBE</b>                   | GGA                  | 17.2                     | 2.7   | 2.9    | 2.7  |
| <b>M06-L</b>                    | meta-GGA             | 2.7                      | 3.7   | n.a.   | n.a. |
| <b>revTPSS</b>                  | meta-GGA             | 9.0                      | n.a.  | n.a.   | 2.4  |
| <b>SCAN</b>                     | meta-GGA             | 4.0                      | 2.1   | 2.0    | 2.1  |
| <b>TPSS</b>                     | meta-GGA             | 13.1                     | 2.6   | 2.8    | 2.7  |
| <b>B3-LYP</b>                   | hybrid               | 13.9                     | 1.6   | 1.9    | 2.2  |
| <b>BH-LYP</b>                   | hybrid               | 12.0                     | 2.3   | 2.6    | 2.6  |
| <b>M06</b>                      | hybrid               | 2.0                      | 4.2   | n.a.   | n.a. |
| <b>M06-2X</b>                   | hybrid               | 2.3                      | 2.8   | n.a.   | n.a. |
| <b>PBE0</b>                     | hybrid               | 10.7                     | 2.9   | 2.9    | 2.6  |
| <b>PW6B95</b>                   | hybrid               | 6.6                      | 2.3   | 2.1    | 2.5  |
| <b>TPSSH</b>                    | hybrid               | 12.8                     | 2.4   | 2.3    | 2.5  |
| <b><math>\omega</math>B-97X</b> | hybrid               | 4.5                      | 5.0   | 6.0    | n.a. |
| <b>B2PLYP</b>                   | double-hybrid        | 4.9                      | 5.7   | 5.6    | 5.7  |
| <b>PWPB95</b>                   | double-hybrid        | 5.1                      | 6.4   | 6.3    | 6.1  |

**Table S7:** RMSE<sub>max</sub> values (see **Equation 6**) of several DFT functionals obtained for the CDN set with triple- $\zeta$  (def2-TZVPD) basis set and several dispersion corrections. Entries marked as ‘n.a.’ indicate combinations that are not available. DLPNO-CCSD(T)/MP2-F12 is used as reference, see **Equation 2**. All values in kcal.mol<sup>-1</sup>.

| Functional                      | Jacob’s ladder class | No dispersion correction | D3(0) | D3(BJ) | D4   |
|---------------------------------|----------------------|--------------------------|-------|--------|------|
| <b>B-LYP</b>                    | GGA                  | 8.6                      | 1.0   | 1.1    | 1.2  |
| <b>B-P</b>                      | GGA                  | 7.3                      | 1.6   | 1.6    | 1.4  |
| <b>B97-D</b>                    | GGA                  | 9.5                      | 1.4   | 1.2    | n.a. |
| <b>OLYP</b>                     | GGA                  | 12.8                     | 1.8   | 1.6    | 1.5  |
| <b>PBE</b>                      | GGA                  | 5.9                      | 1.4   | 1.6    | 1.5  |
| <b>revPBE</b>                   | GGA                  | 9.5                      | 1.4   | 1.4    | 1.3  |
| <b>M06-L</b>                    | meta-GGA             | 0.9                      | 1.7   | n.a.   | n.a. |
| <b>revTPSS</b>                  | meta-GGA             | 5.2                      | n.a.  | n.a.   | 1.2  |
| <b>SCAN</b>                     | meta-GGA             | 2.1                      | 0.9   | 0.8    | 0.8  |
| <b>TPSS</b>                     | meta-GGA             | 7.1                      | 1.2   | 1.4    | 1.2  |
| <b>B3-LYP</b>                   | hybrid               | 7.3                      | 0.7   | 1.0    | 1.1  |
| <b>BH-LYP</b>                   | hybrid               | 5.9                      | 0.9   | 1.0    | 1.1  |
| <b>M06</b>                      | hybrid               | 0.9                      | 2.3   | n.a.   | n.a. |
| <b>M06-2X</b>                   | hybrid               | 0.9                      | 1.0   | n.a.   | n.a. |
| <b>PBE0</b>                     | hybrid               | 5.5                      | 1.0   | 1.1    | 1.2  |
| <b>PW6B95</b>                   | hybrid               | 3.9                      | 0.9   | 0.8    | 1.0  |
| <b>TPSSH</b>                    | hybrid               | 6.9                      | 1.1   | 1.1    | 1.1  |
| <b><math>\omega</math>B-97X</b> | hybrid               | 2.3                      | 1.6   | 1.7    | n.a. |
| <b>B2PLYP</b>                   | double-hybrid        | 2.3                      | 2.5   | 2.5    | 2.9  |
| <b>PWPB95</b>                   | double-hybrid        | 1.7                      | 2.7   | 2.3    | 2.1  |

**Table S8:** MSE values (see **Equation 7**) of several DFT functionals obtained for the subset of “closed” conformers ( $|s| = 74$  conformers) of the **CDN** set with triple- $\zeta$  (def2-TZVPD) basis set and several dispersion corrections. Entries marked as ‘n.a.’ indicate combinations that are not available. DLPNO-CCSD(T)/MP2-F12 is used as reference, see **Equation 2**. All values in kcal.mol<sup>-1</sup>.

| Functional                      | Jacob’s ladder class | No dispersion correction | D3(0) | D3(BJ) | D4   |
|---------------------------------|----------------------|--------------------------|-------|--------|------|
| <b>B-LYP</b>                    | GGA                  | 7.0                      | -0.2  | 0.0    | 0.1  |
| <b>B-P</b>                      | GGA                  | 6.0                      | -0.8  | -0.5   | -0.3 |
| <b>B97-D</b>                    | GGA                  | 7.7                      | 0.8   | 0.3    | n.a. |
| <b>OLYP</b>                     | GGA                  | 10.1                     | 1.2   | 0.8    | 1.2  |
| <b>PBE</b>                      | GGA                  | 4.9                      | 0.8   | 0.9    | 0.9  |
| <b>revPBE</b>                   | GGA                  | 7.7                      | 0.6   | 0.4    | 0.7  |
| <b>M06-L</b>                    | meta-GGA             | -0.3                     | -1.0  | n.a.   | n.a. |
| <b>revTPSS</b>                  | meta-GGA             | 4.3                      | n.a.  | n.a.   | -0.3 |
| <b>SCAN</b>                     | meta-GGA             | 1.7                      | -0.2  | -0.1   | 0.2  |
| <b>TPSS</b>                     | meta-GGA             | 5.9                      | 0.6   | 0.7    | 0.5  |
| <b>B3-LYP</b>                   | hybrid               | 5.8                      | 0.0   | -0.1   | 0.0  |
| <b>BH-LYP</b>                   | hybrid               | 4.6                      | 0.0   | 0.0    | -0.1 |
| <b>M06</b>                      | hybrid               | 0.1                      | -1.8  | n.a.   | n.a. |
| <b>M06-2X</b>                   | hybrid               | 0.1                      | -0.5  | n.a.   | n.a. |
| <b>PBE0</b>                     | hybrid               | 4.4                      | 0.4   | 0.4    | 0.5  |
| <b>PW6B95</b>                   | hybrid               | 3.0                      | 0.3   | 0.2    | 0.5  |
| <b>TPSSH</b>                    | hybrid               | 5.6                      | 0.5   | 0.5    | 0.5  |
| <b><math>\omega</math>B-97X</b> | hybrid               | 1.1                      | -0.6  | -0.2   | n.a. |
| <b>B2PLYP</b>                   | double-hybrid        | 1.2                      | -1.7  | -1.8   | -2.1 |
| <b>PWPB95</b>                   | double-hybrid        | 0.6                      | -1.7  | -1.5   | -1.2 |

**Table S9:** MUE values (see **Equation 4**) of several DFT functionals obtained for the **CDN** set with triple- $\zeta$  (def2-TZVP) basis set and several dispersion corrections. DLPNO-CCSD(T)/MP2-F12 is used as reference, see Equation 2. All values in kcal.mol<sup>-1</sup>

| Functional    | Jacob's ladder class | No dispersion correction | D3(0) | D3(BJ) | D4  |
|---------------|----------------------|--------------------------|-------|--------|-----|
| <b>B-LYP</b>  | GGA                  | 6.0                      | 0.8   | 0.8    | 0.8 |
| <b>B-P</b>    | GGA                  | 5.2                      | 1.2   | 1.1    | 1.0 |
| <b>SCAN</b>   | meta-GGA             | 1.4                      | 0.6   | 0.6    | 0.5 |
| <b>B2PLYP</b> | Double-hybrid        | 2.3                      | 0.5   | 0.6    | 0.8 |
| <b>PWPB95</b> | Double-hybrid        | 1.6                      | 0.9   | 0.6    | 0.5 |

**Table S10:** MAD values (see **Equation 5**) of several DFT functionals obtained for the **CDN** set with triple- $\zeta$  (def2-TZVP) basis set and several dispersion corrections. DLPNO-CCSD(T)/MP2-F12 is used as reference, see Equation 2. All values in kcal.mol<sup>-1</sup>

| Functional    | Jacob's ladder class | No dispersion correction | D3(0) | D3(BJ) | D4  |
|---------------|----------------------|--------------------------|-------|--------|-----|
| <b>B-LYP</b>  | GGA                  | 15.4                     | 2.5   | 3.0    | 3.1 |
| <b>B-P</b>    | GGA                  | 13.0                     | 3.4   | 3.7    | 3.4 |
| <b>SCAN</b>   | meta-GGA             | 3.9                      | 2.3   | 2.2    | 2.4 |
| <b>B2PLYP</b> | Double-hybrid        | 6.2                      | 1.8   | 2.1    | 2.7 |
| <b>PWPB95</b> | Double-hybrid        | 4.0                      | 3.0   | 2.0    | 2.0 |

**Table S11:** RMSE<sub>max</sub> values (see **Equation 6**) of several DFT functionals obtained for the **CDN** set with triple- $\zeta$  (def2-TZVP) basis set and several dispersion corrections. DLPNO-CCSD(T)/MP2-F12 is used as reference, see Equation 2. All values in kcal.mol<sup>-1</sup>

| Functional    | Jacob's ladder class | No dispersion correction | D3(0) | D3(BJ) | D4  |
|---------------|----------------------|--------------------------|-------|--------|-----|
| <b>B-LYP</b>  | GGA                  | 8.4                      | 1.1   | 1.2    | 1.3 |
| <b>B-P</b>    | GGA                  | 7.1                      | 1.7   | 1.7    | 1.4 |
| <b>SCAN</b>   | meta-GGA             | 2.1                      | 1.2   | 1.1    | 0.9 |
| <b>B2PLYP</b> | Double-hybrid        | 3.1                      | 0.8   | 1.0    | 1.4 |
| <b>PWPB95</b> | Double-hybrid        | 2.4                      | 1.4   | 0.9    | 0.8 |

**Table S12:** MSE values (see **Equation 7**) of several DFT functionals obtained for the subset of “closed” conformers ( $|s| = 74$  conformers) of the **CDN** set with triple- $\zeta$  (def2-TZVP) basis set and several dispersion corrections. DLPNO-CCSD(T)/MP2-F12 is used as reference, see Equation 2. All values in kcal.mol<sup>-1</sup>

| Functional    | Jacob's ladder class | No dispersion correction | D3(0) | D3(BJ) | D4   |
|---------------|----------------------|--------------------------|-------|--------|------|
| <b>B-LYP</b>  | GGA                  | 6.7                      | -0.5  | -0.3   | -0.1 |
| <b>B-P</b>    | GGA                  | 5.8                      | -1.0  | -0.7   | -0.5 |
| <b>SCAN</b>   | meta-GGA             | 1.5                      | -0.3  | -0.3   | 0.0  |
| <b>B2PLYP</b> | Double-hybrid        | 2.5                      | -0.5  | -0.5   | -0.9 |
| <b>PWPB95</b> | Double-hybrid        | 1.7                      | -0.6  | -0.4   | -0.1 |

**Table S13:** MUE values (see **Equation 4**) of several DFT functionals obtained for the **CDN** set with quadruple- $\zeta$  (def2-QZVPD) basis set and several dispersion corrections. DLPNO-CCSD(T)/MP2-F12 is used as reference, see Equation 2. All values in kcal.mol<sup>-1</sup>

| Functional   | Jacob's ladder class | No dispersion correction | D3(0) | D3(BJ) | D4   |
|--------------|----------------------|--------------------------|-------|--------|------|
| <b>B-LYP</b> | GGA                  | 6.3                      | 0.6   | 0.7    | 0.7  |
| <b>B-P</b>   | GGA                  | 5.5                      | 1.0   | 1.0    | 0.9  |
| <b>B97-D</b> | GGA                  | 7.0                      | 0.9   | 0.7    | n.a. |
| <b>PBE</b>   | GGA                  | 4.5                      | 1.0   | 1.1    | 1.0  |
| <b>TPSS</b>  | meta-GGA             | 5.3                      | 0.8   | 0.9    | 0.8  |

**Table S14:** MUE values (see **Equation 4**) of several DFT functionals obtained for the **CDN** set with double- $\zeta$  (DZVP-DFT) basis set and several dispersion corrections. Entries marked as ‘n.a.’ indicate combinations that are not available. DLPNO-CCSD(T)/MP2-F12 is used as reference, see **Equation 2**. All values in kcal.mol<sup>-1</sup>

| Functional    | Jacob’s ladder class | No dispersion correction | D3(0) | D3(BJ) | D4   | DZVP-DFT-D3(0) | DZVP-DFT-D3(BJ) |
|---------------|----------------------|--------------------------|-------|--------|------|----------------|-----------------|
| <b>B-LYP</b>  | GGA                  | 5.4                      | 1.3   | 1.2    | 1.1  | 0.7            | 0.8             |
| <b>B-P</b>    | GGA                  | 4.4                      | 1.8   | 1.7    | 1.4  | 0.9            | 0.8             |
| <b>B97-D</b>  | GGA                  | 6.0                      | 0.8   | 0.9    | n.a. | 0.7            | 0.7             |
| <b>PBE</b>    | GGA                  | 3.5                      | 0.8   | 0.8    | 0.7  | 0.7            | 0.7             |
| <b>M06-L</b>  | meta-GGA             | 1.8                      | 2.4   | n.a.   | n.a. | n.a.           | n.a.            |
| <b>TPSS</b>   | meta-GGA             | 4.2                      | 1.0   | 0.9    | 1.0  | 0.8            | 0.7             |
| <b>B3-LYP</b> | hybrid               | 4.3                      | 1.2   | 1.2    | 1.2  | 0.8            | 0.7             |
| <b>BH-LYP</b> | hybrid               | 3.0                      | 1.4   | 1.4    | 1.5  | n.a.           | n.a.            |
| <b>M06</b>    | hybrid               | 1.2                      | 2.7   | n.a.   | n.a. | n.a.           | n.a.            |
| <b>M06-2X</b> | hybrid               | 1.6                      | 2.1   | n.a.   | n.a. | n.a.           | n.a.            |
| <b>PBE0</b>   | hybrid               | 2.8                      | 1.1   | 1.1    | 1.0  | 0.8            | 0.7             |
| <b>TPSSH</b>  | hybrid               | 1.6                      | 1.3   | 1.3    | 1.1  | n.a.           | n.a.            |
| <b>PW6B95</b> | hybrid               | 4.2                      | 1.0   | 0.9    | 1.0  | 0.8            | 0.7             |

**Table S15:** MAD values (see **Equation 5**) of several DFT functionals obtained for the **CDN** set with double- $\zeta$  (DZVP-DFT) basis set and several dispersion corrections. Entries marked as ‘n.a.’ indicate combinations that are not available. DLPNO-CCSD(T)/MP2-F12 is used as reference, see **Equation 2**. All values in kcal.mol<sup>-1</sup>

| Functional    | Jacob’s ladder class | No dispersion correction | D3(0) | D3(BJ) | D4   | DZVP-DFT-D3(0) | DZVP-DFT-D3(BJ) |
|---------------|----------------------|--------------------------|-------|--------|------|----------------|-----------------|
| <b>B-LYP</b>  | GGA                  | 14.5                     | 4.0   | 4.3    | 4.1  | 2.8            | 3.0             |
| <b>B-P</b>    | GGA                  | 12.0                     | 4.9   | 5.0    | 4.8  | 3.3            | 3.6             |
| <b>B97-D</b>  | GGA                  | 16.5                     | 2.9   | 3.1    | n.a. | 2.9            | 2.7             |
| <b>PBE</b>    | GGA                  | 9.7                      | 3.0   | 3.3    | 2.9  | 3.4            | 3.4             |
| <b>M06-L</b>  | meta-GGA             | 5.0                      | 6.6   | n.a.   | n.a. | n.a.           | n.a.            |
| <b>TPSS</b>   | meta-GGA             | 11.4                     | 3.4   | 3.3    | 3.6  | 3.1            | 2.8             |
| <b>B3-LYP</b> | hybrid               | 12.5                     | 3.6   | 4.0    | 3.8  | 2.6            | 2.5             |
| <b>BH-LYP</b> | hybrid               | 9.9                      | 3.8   | 3.9    | 4.2  | n.a.           | n.a.            |
| <b>M06</b>    | hybrid               | 3.4                      | 6.9   | n.a.   | n.a. | n.a.           | n.a.            |
| <b>M06-2X</b> | hybrid               | 5.2                      | 5.7   | n.a.   | n.a. | n.a.           | n.a.            |
| <b>PBE0</b>   | hybrid               | 8.6                      | 3.3   | 3.3    | 3.3  | 2.5            | 2.4             |
| <b>TPSSH</b>  | hybrid               | 4.6                      | 4.0   | 3.9    | 3.8  | n.a.           | n.a.            |
| <b>PW6B95</b> | hybrid               | 10.9                     | 3.5   | 3.5    | 3.4  | n.a.           | n.a.            |

**Table S16:** RMSE<sub>max</sub> values (see **Equation 6**) of several DFT functionals obtained for the **CDN** set with double- $\zeta$  (DZVP-DFT) basis set and several dispersion corrections. Entries marked as ‘n.a.’ indicate combinations that are not available. DLPNO-CCSD(T)/MP2-F12 is used as reference, see **Equation 2**. All values in kcal.mol<sup>-1</sup>

| Functional    | Jacob’s ladder class | No dispersion correction | D3(0) | D3(BJ) | D4   | DZVP-DFT-D3(0) | DZVP-DFT-D3(BJ) |
|---------------|----------------------|--------------------------|-------|--------|------|----------------|-----------------|
| <b>B-LYP</b>  | GGA                  | 7.6                      | 1.8   | 1.7    | 1.7  | 1.1            | 1.3             |
| <b>B-P</b>    | GGA                  | 6.2                      | 2.5   | 2.4    | 2.2  | 1.4            | 1.3             |
| <b>B97-D</b>  | GGA                  | 8.4                      | 1.2   | 1.3    | n.a. | 1.1            | 1.2             |
| <b>PBE</b>    | GGA                  | 4.8                      | 1.2   | 1.2    | 1.2  | 1.2            | 1.3             |
| <b>M06-L</b>  | meta-GGA             | 2.5                      | 3.4   | n.a.   | n.a. | n.a.           | n.a.            |
| <b>TPSS</b>   | meta-GGA             | 5.8                      | 1.6   | 1.6    | 1.6  | 1.4            | 1.4             |
| <b>B3-LYP</b> | hybrid               | 6.2                      | 1.5   | 1.6    | 1.6  | 1.1            | 1.2             |
| <b>BH-LYP</b> | hybrid               | 4.5                      | 1.8   | 1.9    | 2.0  | n.a.           | n.a.            |
| <b>M06</b>    | hybrid               | 1.6                      | 3.6   | n.a.   | n.a. | n.a.           | n.a.            |
| <b>M06-2X</b> | hybrid               | 2.3                      | 2.7   | n.a.   | n.a. | n.a.           | n.a.            |
| <b>PBE0</b>   | hybrid               | 4.0                      | 1.3   | 1.4    | 1.4  | 1.1            | 1.1             |
| <b>TPSSH</b>  | hybrid               | 2.4                      | 1.8   | 1.8    | 1.6  | n.a.           | n.a.            |
| <b>PW6B95</b> | hybrid               | 5.4                      | 1.6   | 1.7    | 1.6  | n.a.           | n.a.            |

**Table S17:** MSE values (see **Equation 7**) of several DFT functionals obtained for the subset of “closed” conformers ( $|s| = 74$  conformers) of the the **CDN** set with double- $\zeta$  (DZVP-DFT) basis set and several dispersion corrections. Entries marked as ‘n.a.’ indicate combinations that are not available. DLPNO-CCSD(T)/MP2-F12 is used as reference, see **Equation 2**. All values in kcal.mol<sup>-1</sup>

| Functional    | Jacob’s ladder class | No dispersion correction | D3(0) | D3(BJ) | D4   | DZVP-DFT-D3(0) | DZVP-DFT-D3(BJ) |
|---------------|----------------------|--------------------------|-------|--------|------|----------------|-----------------|
| <b>B-LYP</b>  | GGA                  | 6.1                      | -1.1  | -0.9   | -0.8 | -0.2           | 0.2             |
| <b>B-P</b>    | GGA                  | 5.0                      | -1.8  | -1.5   | -1.3 | -0.4           | -0.1            |
| <b>B97-D</b>  | GGA                  | 6.7                      | -0.2  | -0.7   | n.a. | 0.1            | 0.2             |
| <b>PBE</b>    | GGA                  | 3.9                      | -0.2  | -0.1   | -0.2 | 0.0            | 0.2             |
| <b>M06-L</b>  | meta-GGA             | -1.8                     | -2.5  | n.a.   | n.a. | n.a.           | n.a.            |
| <b>TPSS</b>   | meta-GGA             | 4.7                      | -0.6  | -0.5   | -0.7 | -0.2           | 0.1             |
| <b>B3-LYP</b> | hybrid               | 4.8                      | -1.0  | -1.1   | -1.0 | -0.4           | -0.1            |
| <b>BH-LYP</b> | hybrid               | 3.3                      | -1.3  | -1.3   | -1.4 | n.a.           | n.a.            |
| <b>M06</b>    | hybrid               | -1.2                     | -3.0  | n.a.   | n.a. | n.a.           | n.a.            |
| <b>M06-2X</b> | hybrid               | -1.5                     | -2.1  | n.a.   | n.a. | n.a.           | n.a.            |
| <b>PBE0</b>   | hybrid               | 3.1                      | -0.9  | -0.9   | -0.9 | -0.4           | -0.2            |
| <b>TPSSH</b>  | hybrid               | 1.7                      | -1.1  | -1.1   | -0.9 | n.a.           | n.a.            |
| <b>PW6B95</b> | hybrid               | 4.3                      | -0.8  | -0.8   | -0.8 | n.a.           | n.a.            |



**Table S18:** MUE values (see **Equation 4**) of several wave-function methods for the **CDN** set. DLPNO-CCSD(T)/MP2-F12 is used as reference, see **Equation 2**. All values in kcal.mol<sup>-1</sup>

| Functional                                 | Basis set                   | Value |
|--------------------------------------------|-----------------------------|-------|
| <b>DLPNO-CCSD(T)<br/>NormalPNO/MP2-F12</b> | aug-cc-pVDZ/cc-<br>pVFZ-F12 | 0.24  |
| <b>HF</b>                                  | aug-cc-pVDZ                 | 5.16  |
| <b>MP2</b>                                 | aug-cc-pVDZ                 | 4.30  |
| <b>MP2-SCS</b>                             | aug-cc-pVDZ                 | 2.75  |
| <b>MP2-SOS</b>                             | aug-cc-pVDZ                 | 1.99  |
| <b>HF</b>                                  | aug-cc-pVTZ                 | 5.85  |
| <b>MP2</b>                                 | aug-cc-pVTZ                 | 2.57  |
| <b>MP2-SCS</b>                             | aug-cc-pVTZ                 | 1.07  |
| <b>MP2-SOS</b>                             | aug-cc-pVTZ                 | 0.45  |
| <b>DLPNO-CCSD(T)<br/>TightPNO</b>          | aug-cc-pVDZ                 | 3.07  |
| <b>DLPNO-CCSD(T)<br/>NormalPNO</b>         | aug-cc-pVDZ                 | 3.10  |
| <b>HF</b>                                  | cc-pVDZ-F12                 | 5.97  |
| <b>MP2F12</b>                              | cc-pVDZ-F12                 | 1.26  |
| <b>SCS-MP2-F12</b>                         | cc-pVDZ-F12                 | 0.54  |
| <b>SOS-MP2-F12</b>                         | cc-pVDZ-F12                 | 1.29  |

**Figure S2:** Relative magnitude of coupling constants  ${}^3J(\text{H}1'/\text{C}8)$  and  ${}^3J(\text{H}1',\text{C}4)$  between ribose hydrogen H-1' and base carbon atoms C-4 and C-8 are related to glycoside torsion angle  $\chi$ , see ref [1]. The relative magnitude of coupling constants  ${}^3J(\text{H}1',\text{C}8) > {}^3J(\text{H}1',\text{C}4)$  indicates *anti*-orientation;  ${}^3J(\text{H}1',\text{C}8) < {}^3J(\text{H}1',\text{C}4)$  indicates *syn*-orientation. Our observed values of  ${}^3J(\text{H}1',\text{C}8) = 2.1$  to  $3.0$  Hz and  ${}^3J(\text{H}1',\text{C}4) < 1$  Hz therefore indicate *anti*-orientation.

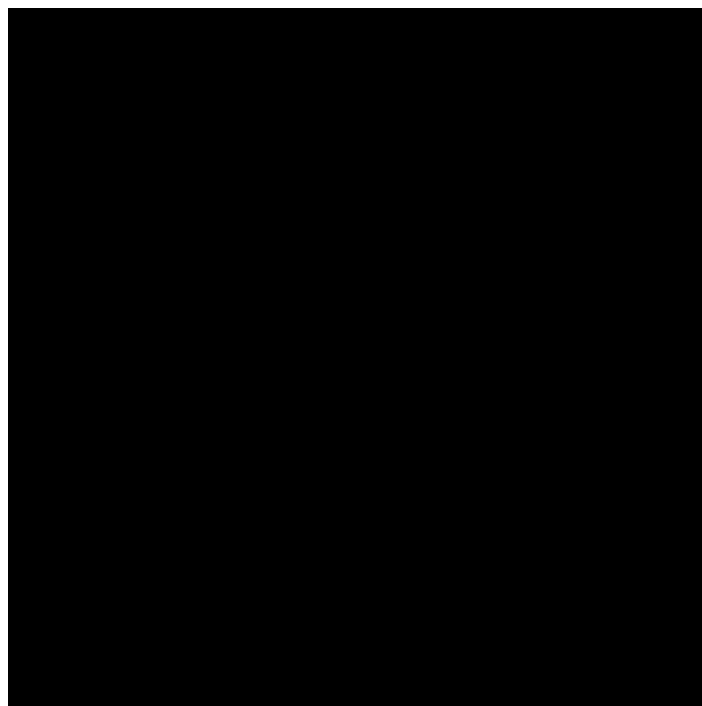

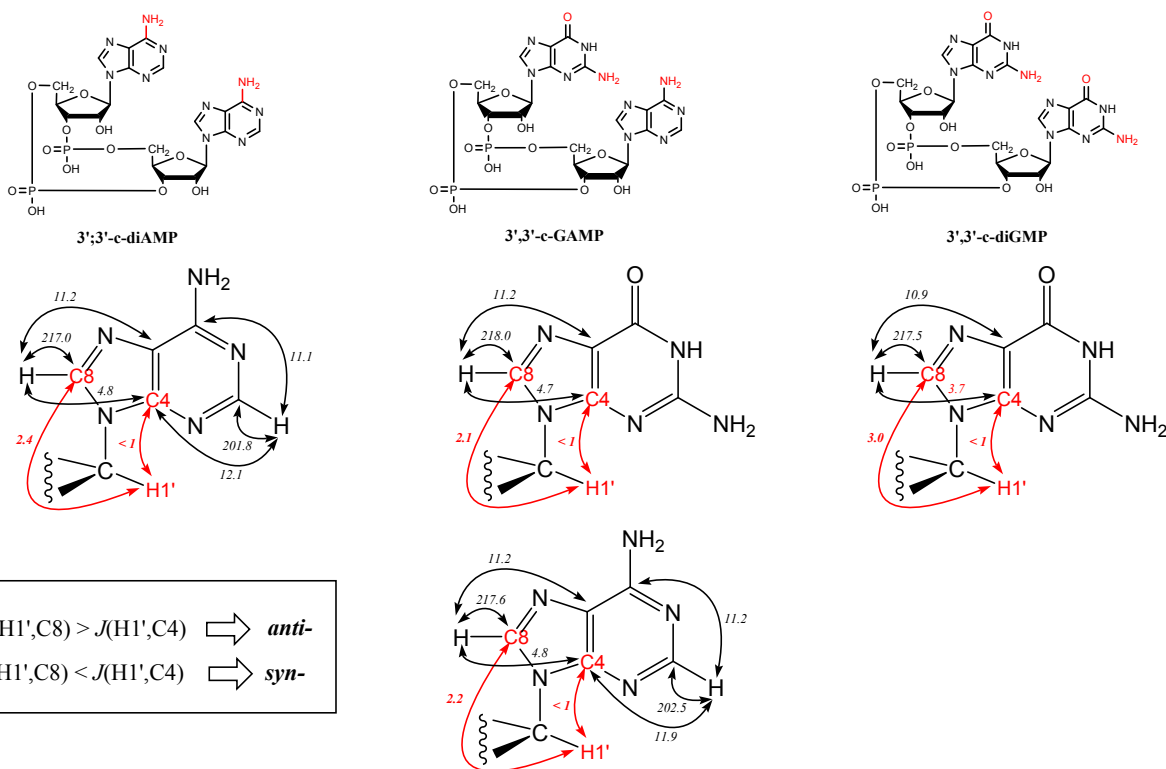

**Table S19:** Correlation of experimental and calculated chemical shifts. The shifts were calculated using B3-LYP/PCM model with 6-31Gd basis set for the lowest-energy conformers of the *Syn-/Anti-* set.

| CDN           | X-conformer Class                                                                                                     | <sup>13</sup> C RMSD | <sup>1</sup> H RMSD |
|---------------|-----------------------------------------------------------------------------------------------------------------------|----------------------|---------------------|
| 3'3'-c-di-AMP | <i>anti- / anti-</i>                                                                                                  | 0.9979               | 0.9912              |
|               | <i>syn- / anti-</i>                                                                                                   | 0.9972               | 0.9353              |
|               | <i>syn- / syn-</i>                                                                                                    | 0.9943               | 0.8606              |
|               | <i>anti-anti</i> (57 %)<br>+ <i>syn-anti</i> (40 %)<br>+ <i>syn-syn</i> (3 %) <sup>a</sup>                            | 0.9980               | 0.9844              |
|               |                                                                                                                       |                      |                     |
| 3'3'-c-GAMP   | <i>anti- / anti-</i>                                                                                                  | 0.9971               | 0.9834              |
|               | <i>anti- / syn-</i>                                                                                                   | 0.9963               | 0.9552              |
|               | <i>syn- / anti-</i>                                                                                                   | 0.9958               | 0.8658              |
|               | <i>syn- / syn-</i>                                                                                                    | 0.9957               | 0.8958              |
|               | <i>anti-anti</i> (18 %)<br>+ <i>syn-anti</i> (61 %)<br>+ <i>anti-syn</i> (9 %)<br>+ <i>syn-syn</i> (12%) <sup>a</sup> | 0.9970               | 0.9811              |
| 3'3'-c-di-GMP | <i>anti- / anti-</i>                                                                                                  | 0.9980               | 0.9706              |
|               | <i>syn- / anti-</i>                                                                                                   | 0.9955               | 0.8553              |
|               | <i>syn- / syn-</i>                                                                                                    | 0.9938               | 0.7666              |
|               | <i>anti-anti</i> (8 %) +<br><i>syn-anti</i> (31 %) +<br><i>syn-syn</i> (61 %) <sup>a</sup>                            | 0.9968               | 0.8922              |

<sup>a</sup> Calculated average values of chemical shifts were obtained for conformation mixture with populations estimated by molecular dynamics.

**Table S20:** Experimental transient NOEs. Intensities are normalized with respect to the intensity of irradiated inverted peak = -100).

| CDN           | signal<br>inverted | observed NOEs |      |      |       |
|---------------|--------------------|---------------|------|------|-------|
|               |                    | H8            | H1'  | H2'  | H3'   |
| 3'3'-c-di-AMP | H8                 | -             | 0.71 | 0.60 | 2.43  |
|               | H1'                | 0.41          | -    | 2.44 | -0.66 |
| 3'3'-c-GAMP   | H8 (G)             | -             | 0.79 | 0.49 | 0.56  |
|               | H1' (G)            | 0.36          | -    | 1.59 | 0.76  |
|               | H8 (A)             | -             | 0.62 | 0.58 | 0.70  |
|               | H1' (A)            | 0.39          | -    | 1.59 | 0.76  |
| 3'3'-c-diGMP  | H8                 | -             | 0.83 | 0.60 | 0.88  |
|               | H1'                | 0.58          | -    | 1.24 | 0.72  |

**Table S21:** Experimental 2D ROESY signals. n.d. stands for 'not determined'. Absolute (abs.) intensities and intensities relative (rel.) to H1'/H2' signal strength are listed.

| Proton pair      | 3'3'-c-di-AMP   |                 | 3'3'-c-GAMP     |                 |                 |                 | 3'3'-c-diGMP    |                 |
|------------------|-----------------|-----------------|-----------------|-----------------|-----------------|-----------------|-----------------|-----------------|
|                  | A               |                 | G               |                 | A               |                 | G               |                 |
|                  | <i>I (abs.)</i> | <i>I (rel.)</i> |
| <b>H8 / H1'</b>  | 3.38            | 0.19            | 1.82            | 0.43            | 1.53            | 0.30            | 0.77            | 0.52            |
| <b>H8 / H2'</b>  | 2.97            | 0.17            | 1.24            | 0.29            | 1.50            | 0.29            | 0.54            | 0.36            |
| <b>H8 / H3'</b>  | 17.39           | 0.97            | 2.76            | 0.65            | 3.20            | 0.62            | 1.46            | 0.99            |
| <b>H2 / H1'</b>  | 0.63            | 0.04            | -               | -               | ~0              | ~0              | -               | -               |
| <b>H2 / H2'</b>  | 7.05            | 0.40            | -               | -               | 2.97            | 0.57            | -               | -               |
| <b>H2 / H3'</b>  | 4.09            | 0.23            | -               | -               | 2.36            | 0.46            | -               | -               |
| <b>H1' / H2'</b> | 17.84           | 1.00            | 4.23            | 1.00            | 5.19            | 1.00            | 1.47            | 1.00            |

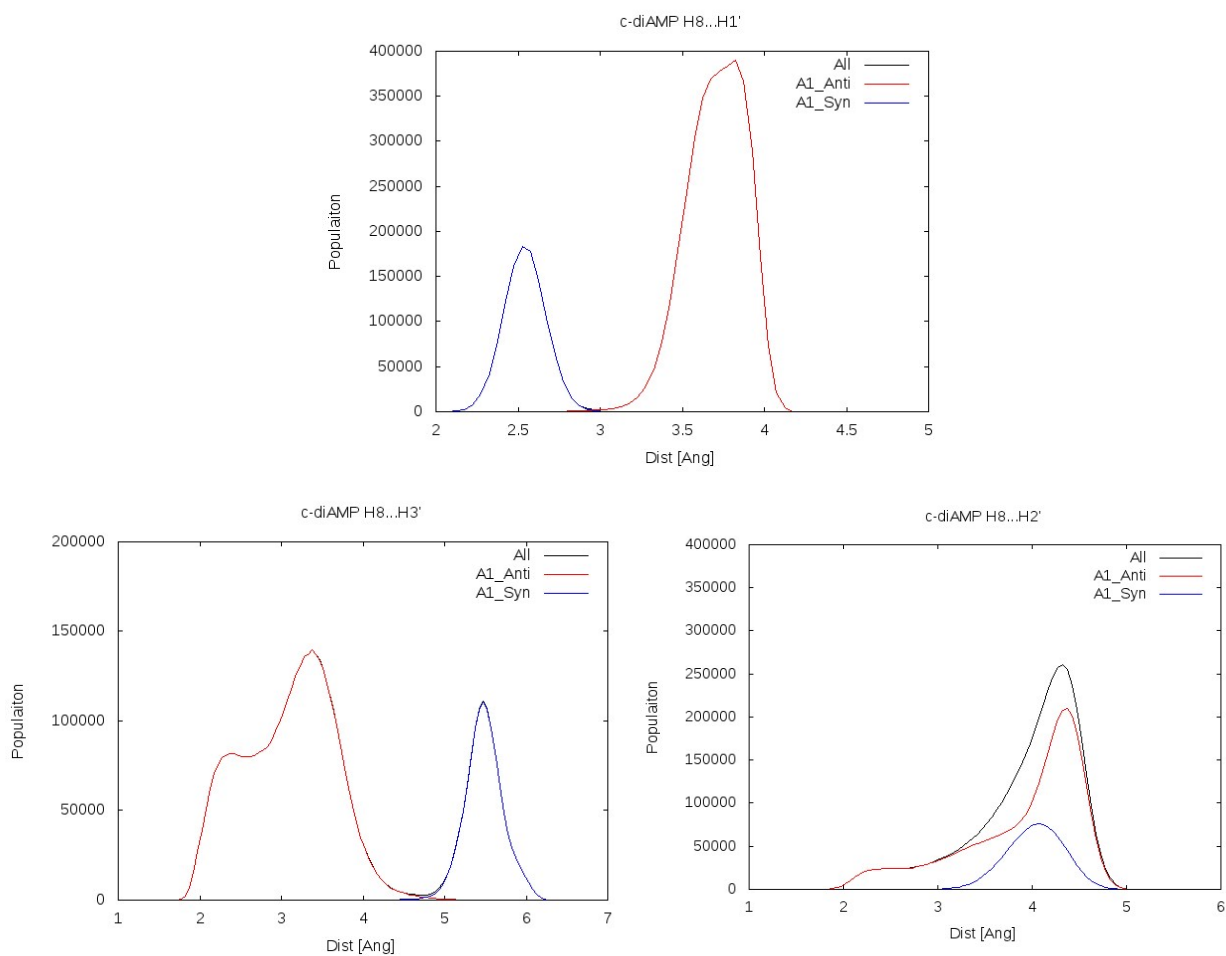

**Figure S3:** Distance distributions of purine H8 and ribose protons H1' (top), H2' (bottom left), and H3' (bottom right) as obtained in MD simulations of 3'3'-c-diAMP. H8/H1' distribution displays the sharpest and most separated peaks for *syn*- and *anti*- conformations, which makes it preferable for interpretation of ROESY spectra as done in section 3.2 of the main text.

**Table S22:** Conformational energies of lowest free-energy  $\chi$ -conformers of the *Syn-/Anti-* set of 3'3'-c-di-AMP, 3'3'-c-GAMP, and 3'3'-c-di-GMP. Each column represents a result obtained with a unique combination of optimization method (indicated by the top row – “Opt.”) and a single-point energy method (indicated by the second row – “SPE”). The original structures of the *Syn-/Anti-* set were optimized with B-P/COSMO protocol as described in the Computational Details section; these structures were then reoptimized by the respective methods listed in the table below. Lowest free-energy conformer for each of the molecules is highlighted in bold. All values are in kcal.mol<sup>-1</sup>.

| CDN           | X-conformer Class    | Opt. | B-P/<br>COSMO | B-P/<br>COSMO  | B-P/<br>COSMO    | B-P/<br>COSMO      | B3-LYP/<br>SMD | B3-LYP/<br>SMD      | B3-LYP/<br>SMD     |
|---------------|----------------------|------|---------------|----------------|------------------|--------------------|----------------|---------------------|--------------------|
|               |                      | SPE  | B-P/<br>COSMO | B-LYP/<br>CPCM | B-P/<br>COSMO-RS | DLPNO/<br>COSMO-RS | B3-LYP/<br>SMD | B3-LYP/<br>COSMO-RS | DLPNO/<br>COSMO-RS |
| 3'3'-c-di-AMP | <i>anti- / anti-</i> |      | <b>0.0</b>    | <b>0.0</b>     | 1.2              | 0.9                | <b>0.0</b>     | 1.9                 | 2.1                |
|               | <i>syn- / anti-</i>  |      | 1.2           | 2.1            | <b>0.0</b>       | <b>0.0</b>         | 2.0            | <b>0.0</b>          | <b>0.0</b>         |
|               | <i>syn- / syn-</i>   |      | 5.1           | 5.4            | 3.1              | 2.9                | 7.8            | 4.5                 | 5.1                |
| 3'3'-c-GAMP   | <i>anti- / anti-</i> |      | 2.1           | 2.4            | 3.0              | 2.3                | 2.6            | 0.6                 | <b>0.0</b>         |
|               | <i>anti- / syn-</i>  |      | 4.5           | 4.7            | 0.4              | <b>0.0</b>         | 4.8            | 0.5                 | 1.4                |
|               | <i>syn- / anti-</i>  |      | <b>0.0</b>    | <b>0.0</b>     | <b>0.0</b>       | 0.3                | <b>0.0</b>     | <b>0.0</b>          | 1.2                |
|               | <i>syn- / syn-</i>   |      | 2.3           | 1.9            | 3.3              | 2.5                | 1.8            | 0.3                 | 1.5                |
| 3'3'-c-di-GMP | <i>anti- / anti-</i> |      | 1.9           | 1.8            | 3.5              | 2.1                | <b>0.0</b>     | 0.1                 | <b>0.0</b>         |
|               | <i>syn- / anti-</i>  |      | <b>0.0</b>    | 0.6            | <b>0.0</b>       | <b>0.0</b>         | <b>0.0</b>     | <b>0.0</b>          | 0.7                |
|               | <i>syn- / syn-</i>   |      | 0.8           | <b>0.0</b>     | 2.7              | 3.9                | 0.8            | 1.6                 | 2.4                |

**Table S22 (continued)** : Conformational energies of lowest free-energy  $\chi$ -conformers of the *Syn-/Anti-* set of 3'3'-c-di-AMP, 3'3'-c-GAMP, and 3'3'-c-di-GMP. Each column represents a result obtained with a unique combination of optimization method (indicated by the top row – “Opt.”) and a single-point energy method (indicated by the second row – “SPE”). The original structures of the *Syn-/Anti-* set were optimized with B-P/COSMO protocol as described in the Computational Details section; these structures were then reoptimized by the respective methods listed in the table below. Lowest free-energy conformer for each of the molecules is highlighted in bold. All values are in kcal.mol<sup>-1</sup>.

| CDN                  | X-conformer Class    | Opt. | B3-LYP/<br>CPCM | B3-LYP/<br>CPCM  | TPSS/<br>SMD       | TPSS/<br>SMD   | TPSS/<br>CPCM | TPSS/<br>CPCM      |
|----------------------|----------------------|------|-----------------|------------------|--------------------|----------------|---------------|--------------------|
|                      |                      | SPE  | B3-LYP/<br>CPCM | B-P/<br>COSMO-RS | DLPNO/<br>COSMO-RS | B3-LYP/<br>SMD | TPSS/<br>CPCM | DLPNO/<br>COSMO-RS |
| <b>3'3'-c-di-AMP</b> | <i>anti- / anti-</i> |      | <b>0.0</b>      | 1.3              | <b>0.0</b>         | 1.1            | <b>0.0</b>    | 2.9                |
|                      | <i>syn- / anti-</i>  |      | 1.9             | <b>0.0</b>       | 2.2                | <b>0.0</b>     | 1.2           | <b>0.0</b>         |
|                      | <i>syn- / syn-</i>   |      | 6.7             | 3.4              | 7.4                | 3.4            | 6.6           | 4.6                |
| <b>3'3'-c-GAMP</b>   | <i>anti- / anti-</i> |      | 3.4             | 1.7              | 1.6                | 1.7            | 2.1           | 1.5                |
|                      | <i>anti- / syn-</i>  |      | 3.8             | 0.9              | 3.6                | 1.0            | 5.3           | 2.9                |
|                      | <i>syn- / anti-</i>  |      | <b>0.0</b>      | <b>0.0</b>       | <b>0.0</b>         | <b>0.0</b>     | <b>0.0</b>    | <b>0.0</b>         |
|                      | <i>syn- / syn-</i>   |      | 1.2             | 0.8              | 2.3                | 2.1            | 2.8           | 1.4                |
| <b>3'3'-c-di-GMP</b> | <i>anti- / anti-</i> |      | 1.0             | 0.4              | <b>0.0</b>         | 2.3            | 0.5           | 1.6                |
|                      | <i>syn- / anti-</i>  |      | <b>0.0</b>      | <b>0.0</b>       | 1.0                | <b>0.0</b>     | <b>0.0</b>    | <b>0.0</b>         |
|                      | <i>syn- / syn-</i>   |      | 0.3             | 2.0              | 1.9                | 3.0            | 1.4           | 1.2                |



**Table S23:** Conformational energies of lowest-energy  $\chi$ -conformers of the **Syn/Anti** set of 3'3'-c-di-AMP, 3'3'-c-GAMP, and 3'3'-c-di-GMP . Lowest conformer for each of the molecules is highlighted in bold. Addition of zero-point vibrational energies (middle column), or ZPVE + thermal contributions (right column) introduces only minor changes into relative ranking of conformers

| CDN           | X-conformer Class    | $E_{gp} + G_{solv}$ | $E_{gp} + G_{solv} + ZPVE$ | $E_{gp} + G_{solv} + ZPVE - RTlnQ$ |
|---------------|----------------------|---------------------|----------------------------|------------------------------------|
| 3'3'-c-di-AMP | <i>anti- / anti-</i> | 0.9                 | 0.6                        | <b>0.0</b>                         |
|               | <i>syn- / anti-</i>  | <b>0.0</b>          | <b>0.0</b>                 | 0.5                                |
|               | <i>syn- / syn-</i>   | 2.9                 | 2.6                        | 2.8                                |
| 3'3'-c-GAMP   | <i>anti- / anti-</i> | 2.3                 | 2.8                        | 3.2                                |
|               | <i>anti- / syn-</i>  | <b>0.0</b>          | <b>0.0</b>                 | <b>0.0</b>                         |
|               | <i>syn- / anti-</i>  | 0.3                 | 1.1                        | 1.9                                |
|               | <i>syn- / syn-</i>   | 2.5                 | 2.8                        | 2.7                                |
| 3'3'-c-di-GMP | <i>anti- / anti-</i> | 2.1                 | 2.3                        | 2.1                                |
|               | <i>syn- / anti-</i>  | <b>0.0</b>          | <b>0.0</b>                 | <b>0.0</b>                         |
|               | <i>syn- / syn-</i>   | 3.9                 | 5.1                        | 5.0                                |

**Table S24:** Comparison of  $\chi$ -conformer populations from MD simulations as described in Table 7 of the main text (left column) and an independent-base model (right column), assuming  $p(A,anti-) = 0.756$  and  $p(G,anti-) = 0.216$ .

| CDN           | $\chi$ -conformer      | MD         | Independent-base |
|---------------|------------------------|------------|------------------|
|               |                        | population | model            |
|               |                        | %          | %                |
| 3'3'-c-di-AMP | <i>anti- / anti-</i>   | 57         | 57               |
|               | <i>syn- / anti-</i>    | 40         | 37               |
|               | <i>syn- / syn-</i>     | 3          | 6                |
| 3'3'-c-GAMP   | <i>anti- / anti-</i>   | 18         | 16               |
|               | <i>Gsyn- / A anti-</i> | 61         | 59               |
|               | <i>Ganti- / A syn-</i> | 9          | 5                |
|               | <i>syn- / syn-</i>     | 12         | 19               |
| 3'3'-c-di-GMP | <i>anti- / anti-</i>   | 8          | 5                |
|               | <i>syn- / anti-</i>    | 31         | 34               |
|               | <i>syn- / syn-</i>     | 61         | 61               |

**Table S25:** Number of syn-/anti- interconversions observed in MD simulations. Total time of the simulation was 50  $\mu$ s.

| CDN                      | no. of           | transition time scale |
|--------------------------|------------------|-----------------------|
|                          | interconversions | [ns]                  |
| <b>3'3'-c-di-AMP</b>     | 9186 and 9432    | 5.4                   |
| <b>G of 3',3'-c-GAMP</b> | 1233             | 40.6                  |
| <b>A of 3',3'-c-GAMP</b> | 3808             | 13.1                  |
| <b>3'3'-c-GAMP</b>       | 659 and 689      | 74.2                  |

**Figure S4:** Definitions of torsion angles of the macrocycle. Dihedrals  $\beta$  and  $\epsilon$  are highlighted in red.

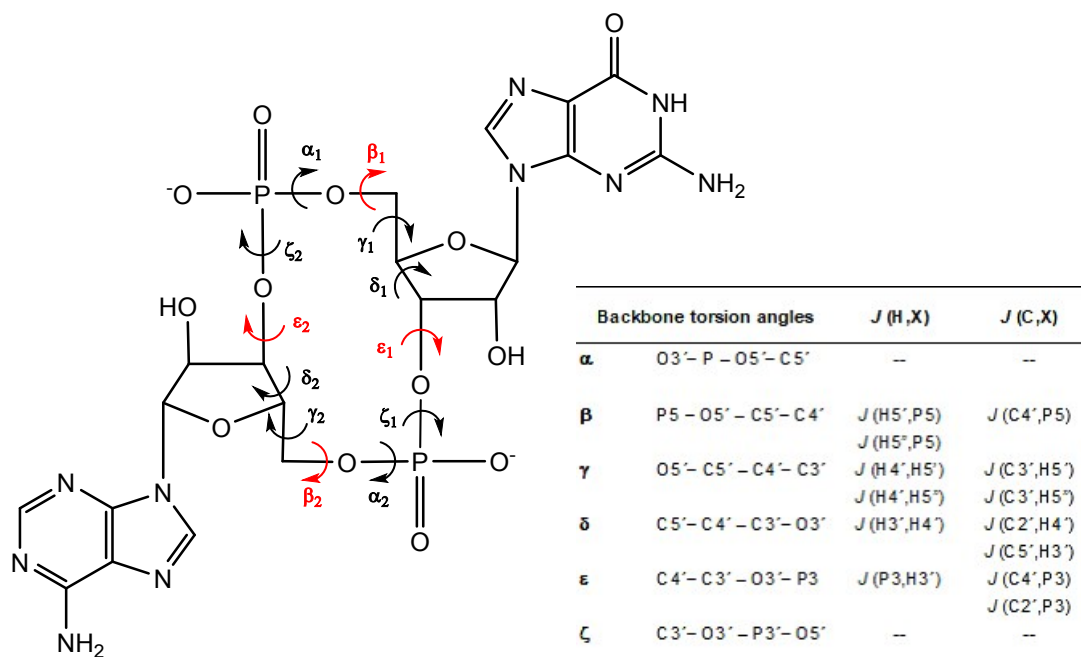

**Table S26:** Values of  ${}^3J(C4',P5')$  and comparison of the  $\beta$ -dihedral angle as calculated from NMR data, DFT and MD calculations.

| CDN                      | ${}^3J(C4',P5')$<br>[Hz] | $\beta$ [degrees] |                  |                          |
|--------------------------|--------------------------|-------------------|------------------|--------------------------|
|                          |                          | NMR <sup>a</sup>  | DFT <sup>b</sup> | MD                       |
| <b>3'3'-c-di-AMP</b>     | 11.0                     | -164              | -145             | -171 (-164) <sup>c</sup> |
| <b>G of 3',3'-c-GAMP</b> | 10.8                     | -162              | -139             |                          |
| <b>A of 3',3'-c-GAMP</b> | 10.6                     | -160              | -141             |                          |
| <b>3'3'-c-di-GMP</b>     | 10.7                     | -161              | -142; -140       |                          |

<sup>a</sup> Torsion angles determined from Karplus-type equation:  ${}^3J(C,P) = 9.1 \cos^2\Phi - 1.9 \cos\Phi + 0.8$ , see ref [2].

<sup>b</sup> Lowest-energy *Anti-/anti-* conformations from the *Syn-/Anti-* dataset are considered.

<sup>c</sup> Modal values of observed *anti-/anti-* populations are listed. Modus of the smaller population is listed in brackets.

**Table S27:** Values of  ${}^3J(C4',P3')$  and comparison of the  $\epsilon$ -dihedral angle as calculated from NMR data, DFT and MD calculations.

| CDN                      | ${}^3J(C4',P3')$<br>[Hz] | $\epsilon$ [degrees] |                  |                          |
|--------------------------|--------------------------|----------------------|------------------|--------------------------|
|                          |                          | NMR <sup>a</sup>     | DFT <sup>b</sup> | MD                       |
| <b>3'3'-c-di-AMP</b>     | 11.0                     | -164                 | 176              | -154 (-164) <sup>c</sup> |
| <b>G of 3',3'-c-GAMP</b> | 10.8                     | -162                 | 172              |                          |
| <b>A of 3',3'-c-GAMP</b> | 10.6                     | -160                 | 172              |                          |
| <b>3'3'-c-di-GMP</b>     | 10.1                     | -156                 | 173; 172         |                          |

<sup>a</sup> Torsion angles determined from Karplus-type equation:  ${}^3J(C,P) = 9.1 \cos^2\Phi - 1.9 \cos\Phi + 0.8$ , see ref [2].

<sup>b</sup> Lowest-energy *anti-/anti-* conformations from the *Syn-/Anti-* dataset are considered.

<sup>c</sup> Modal values of observed *anti-/anti-* populations are listed. Modus of the smaller population is listed in brackets.

**References:**

- 1 J. H. Ippel, S. S. Wijmenga, R. de Jong, H. A. Heus, C. W. Hilbers, E. de Vroom, G. A. van der Marel and J. H. van Boom, Heteronuclear Scalar Couplings in the Bases and Sugar Rings of Nucleic Acids: Their Determination and Application in Assignment and Conformational Analysis, *Magnetic Resonance in Chemistry*, 1996, **34**, S156–S176.
- 2 J. Plavec and J. Chattopadhyaya, Reparametrization of Karplus equation relating  $^3J_{C-C-O-P}$  to torsion angle, *Tetrahedron Letters*, 1995, **36**, 1949–1952.
